# Supplementary material for: Haloperidol, clonidine and resolution of delirium in critically ill patients: a prospective cohort study
Source: Springer Nature journal article supplement (doi:10.1007/s00134-021-06355-9), 2021-02-16
Supplement: MOESM3 [file 18864918]

Online Resource 3 – Table 1. Characteristics of observation days, stratified by mental status on day X

| Characteristic                                         | All observation days (n = 24,906) | Mental status on day X <sup>a</sup> |                      |                       |
|--------------------------------------------------------|-----------------------------------|-------------------------------------|----------------------|-----------------------|
|                                                        |                                   | Awake without delirium (n=12,169)   | Delirium (n=4,708)   | Unarousable (n=4,483) |
| mSOFA (IQR) <sup>a</sup>                               | 5.0 (3.0-8.0)                     | 5.0 (3.0-7.0)                       | 6.0 (4.0-9.0)        | 9.0 (6.0-11.0)        |
| Metabolic acidosis, n (%)                              | 5,125 (20.6%)                     | 1,932 (15.9%)                       | 842 (17.9%)          | 2,019 (45.0%)         |
| Use of mechanical ventilation, n (%)                   | 18,220 (73.2%)                    | 9,075 (74.6%)                       | 3,964 (84.2%)        | 4,046 (90.3%)         |
| Use of haloperidol, n (%)                              | 3,216 (12.9%)                     | 672 (5.5%)                          | 2,211 (47.0%)        | 180 (4.0%)            |
| Haloperidol dose in mg (IQR) <sup>b</sup>              | 2.4 (1.2-4.0)                     | 1.8 (1.2-3.0)                       | 3.0 (1.8-4.2)        | 2.4 (1.8-4.0)         |
| Use of clonidine, n (%)                                | 4,194 (16.8%)                     | 1,679 (13.8%)                       | 1,634 (34.7%)        | 666 (14.9%)           |
| Clonidine dose in mcg (IQR) <sup>b</sup>               | 462.8 (150.0-900.6)               | 342.4 (107.7-678.0)                 | 605.0 (246.7-1074.5) | 529.9 (174.8-1037.3)  |
| Use of any antipsychotic other than haloperidol, n (%) | 1,088 (4.4%)                      | 608 (5.0%)                          | 395 (8.4%)           | 63 (1.4%)             |
| Use of benzodiazepines or propofol, n (%)              | 11,115 (44.6%)                    | 4,538 (37.3%)                       | 2,125 (45.1%)        | 3,836 (85.6%)         |
| Use of opioids, n (%)                                  | 13,874 (55.7%)                    | 6,195 (50.9%)                       | 2,769 (58.8%)        | 3,660 (81.6%)         |

IQR: Interquartile range; mcg: microgram; mg: milligram; mSOFA: modified Sequential Organ Failure

Assessment (without central nervous system component)

<sup>a</sup> Missing data were present for some observation days: current mental status on day X 3546 (14.2%); mSOFA 981 (3.9%).

<sup>b</sup> Median dose is calculated only for observation days upon which haloperidol/clonidine was administered.

*Online Resource 3 – Table 2. Administration of haloperidol and clonidine, stratified by delirium motor subtype on day X.*

| <b>Medication use</b> | <b>Mixed/hyperactive delirium day<br/>(n=2581)</b> | <b>Hypoactive delirium day<br/>(n=2110)</b> | <b>p value</b> |
|-----------------------|----------------------------------------------------|---------------------------------------------|----------------|
| Haloperidol, n (%)    | 1475 (57.1%)                                       | 735 (34.8%)                                 | <.001          |
| Clonidine, n (%)      | 1201 (46.5%)                                       | 431 (20.4%)                                 | <.001          |
