# Supplementary material for: Haloperidol, clonidine and resolution of delirium in critically ill patients: a prospective cohort study
Source: Springer Nature journal article supplement (doi:10.1007/s00134-021-06355-9), 2021-02-16
Supplement: MOESM5 [file 18864918]

1 *Online Resource 5 - Table 1. Sensitivity analysis on delirium resolution the following day in motor delirium*  
 2 *subtypes using a Markov regression model.*

| <b>Motor delirium subtype</b>        | <b>Exposure on day X</b>       | <b>n</b> | <b>Adjusted OR<br/>(95%CI) <sup>a</sup></b> | <b>p value</b> |
|--------------------------------------|--------------------------------|----------|---------------------------------------------|----------------|
| Hyperactive or mixed<br>delirium day | No haloperidol or clonidine    | 633      | Reference <sup>b</sup>                      |                |
|                                      | Haloperidol only               | 747      | 0.43 (0.32-0.59)                            | <.001          |
|                                      | Clonidine only                 | 473      | 0.86 (0.63-1.17)                            | 0.331          |
|                                      | Both haloperidol and clonidine | 728      | 0.45 (0.34-0.61)                            | <.001          |
| Hypoactive delirium day              | No haloperidol or clonidine    | 1119     | Reference <sup>b</sup>                      |                |
|                                      | Haloperidol only               | 560      | 0.65 (0.51-0.84)                            | <.001          |
|                                      | Clonidine only                 | 256      | 0.72 (0.51-1.01)                            | 0.055          |
|                                      | Both haloperidol and clonidine | 175      | 0.64 (0.44-0.95)                            | 0.029          |

3 CI = Confidence Interval; OR = Odds Ratio

4 <sup>a</sup> Adjusted for age, APACHE IV score, admission type (acute surgery, elective surgery, medical reason), patients'  
 5 mental status on the prior day (day X), modified SOFA score, metabolic acidosis, use of ventilation and  
 6 administration of any antipsychotic other than haloperidol, benzodiazepines, propofol and opioids.

7 <sup>b</sup> Reference is transition from delirium to delirium or unarousable state on the following day, with no haloperidol or  
 8 clonidine administered on the delirium day. Mortality or discharge on day X + 1 was included as a competing event.

9

10 *Online Resource 5 - Table 2. Sensitivity analysis on delirium resolution the following day based on inclusion period*  
 11 *using a Markov regression model.*

| <b>Inclusion period</b> | <b>Exposure on day X</b>       | <b>n</b> | <b>Adjusted OR<br/>(95%CI) <sup>a</sup></b> | <b>p value</b> |
|-------------------------|--------------------------------|----------|---------------------------------------------|----------------|
| 2011 - 2013             | No haloperidol or clonidine    | 853      | Reference <sup>b</sup>                      |                |
|                         | Haloperidol only               | 772      | 0.49 (0.38-0.63)                            | <0.001         |
|                         | Clonidine only                 | 156      | 0.88 (0.58-1.33)                            | 0.533          |
|                         | Both haloperidol and clonidine | 277      | 0.43 (0.29-0.63)                            | <0.001         |
| 2015 - 2019             | No haloperidol or clonidine    | 913      | Reference <sup>b</sup>                      |                |
|                         | Haloperidol only               | 536      | 0.44 (0.33-0.59)                            | <0.001         |
|                         | Clonidine only                 | 575      | 0.75 (0.57-0.99)                            | 0.041          |
|                         | Both haloperidol and clonidine | 626      | 0.47 (0.35-0.61)                            | <0.001         |

12 CI = Confidence Interval; OR = Odds Ratio

13 <sup>a</sup> Adjusted for age, APACHE IV score, admission type (acute surgery, elective surgery, medical reason), patients'  
 14 mental status on the prior day (day X), modified SOFA score, metabolic acidosis, use of ventilation and  
 15 administration of any antipsychotic other than haloperidol, benzodiazepines, propofol and opioids.

16 <sup>b</sup> Reference is transition from delirium to delirium or unarousable state on the following day, with no haloperidol or  
 17 clonidine administered on the delirium day. Mortality or discharge on day X + 1 was included as a competing event.

18  
 19  
 20  
 21  
 22  
 23  
 24  
 25  
 26  
 27

28 *Online Resource 5 - Table 3. Sensitivity analysis on delirium resolution on day X+2 using a Markov regression*  
29 *model .<sup>a</sup>*

| <b>Exposure on day X</b>       | <b>Mental status on day X+2</b> | <b>n</b> | <b>Adjusted OR (95% CI)<sup>b</sup></b> | <b>p value</b> |
|--------------------------------|---------------------------------|----------|-----------------------------------------|----------------|
| No haloperidol or clonidine    | Delirious or unarousable        | 816      | Reference                               |                |
| Haloperidol only               | Awake without delirium          | 260      | 0.50 (0.41-0.61)                        | <.001          |
| Clonidine only                 | Awake without delirium          | 228      | 0.96 (0.77-1.20)                        | 0.747          |
| Both haloperidol and clonidine | Awake without delirium          | 187      | 0.56 (0.46-0.70)                        | <.001          |

30 CI = Confidence Interval; OR = Odds Ratio.

31 <sup>a</sup> Mortality or discharge on day X + 2 was included as a competing event.

32 <sup>b</sup> Adjusted for age, APACHE IV score, admission type (acute surgery, elective surgery, medical reason), patients'  
33 mental status on day X, modified SOFA score, metabolic acidosis, use of ventilation, and administration of any  
34 antipsychotic other than haloperidol, benzodiazepines, propofol and opioids.
