# Supplementary figures and images for: Haloperidol, clonidine and resolution of delirium in critically ill patients: a prospective cohort study
Source: Springer Nature journal article supplement (doi:10.1007/s00134-021-06355-9), 2021-02-16

*Online Resource 1. Overview of daily delirium transitions and outcomes of interest*

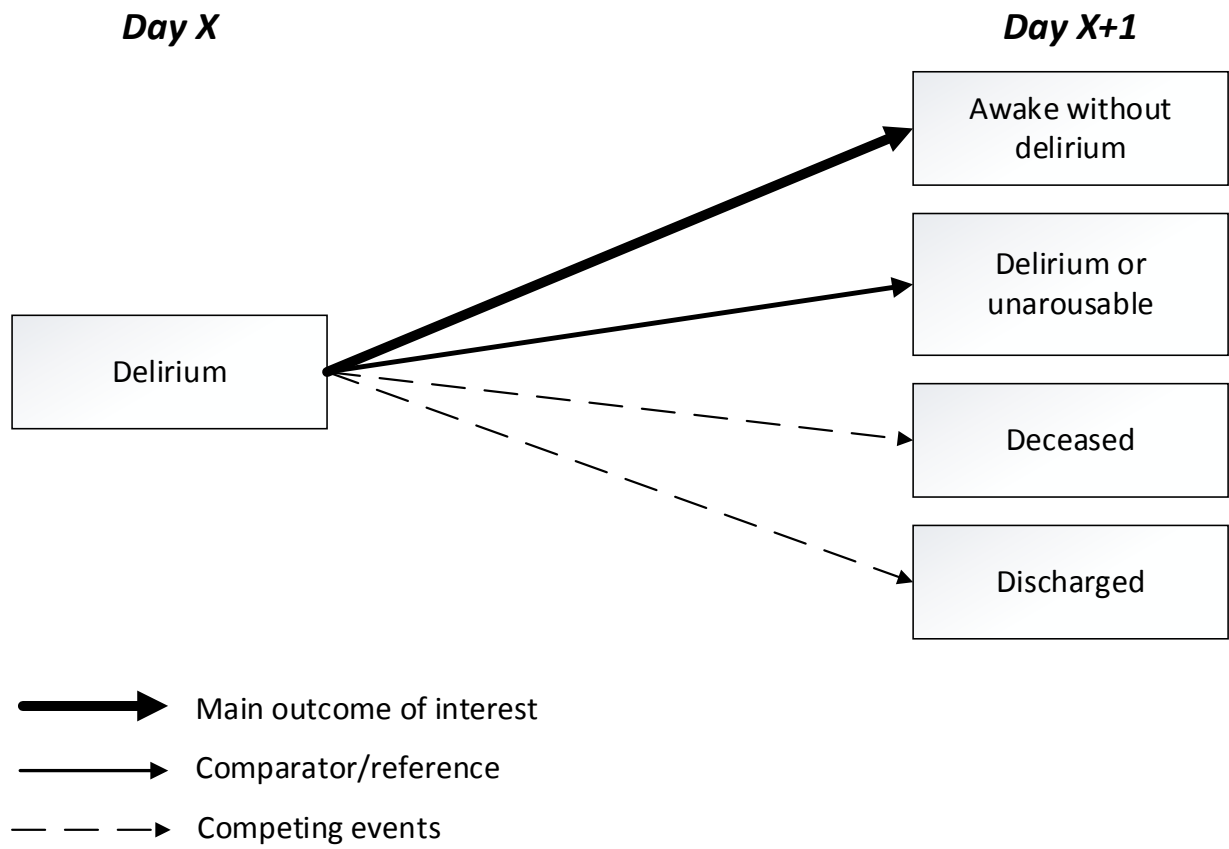

Supplement: MOESM1 [file 18864918]

Online Resource 2. Flowchart of patient inclusion

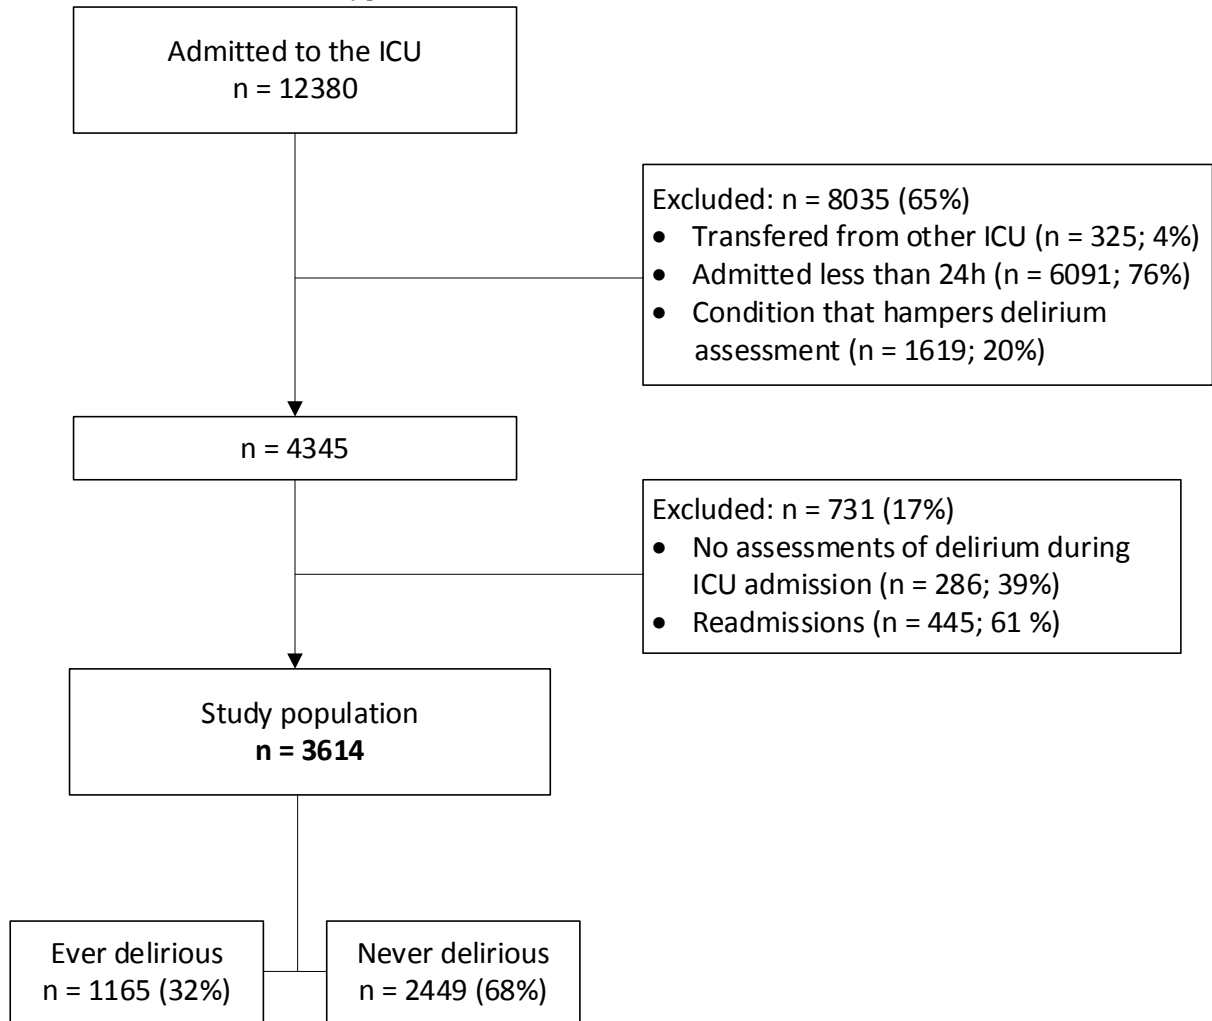

Supplement: MOESM2 [file 18864918]
